# Supplementary material for: Characterizing Complex Networks Using Entropy-Degree Diagrams: Unveiling Changes in Functional Brain Connectivity Induced by Ayahuasca
Source: MDPI journal article supplement (doi:10.3390/e21020128), 2019-01-30
Supplement: s1 [file s1]

# **Supplementary Materials: Characterizing complex networks using entropy-degree diagrams: unveiling changes in functional brain connectivity induced by Ayahuasca**

A. Viol <sup>1,2\*</sup>, Fernanda Palhano-Fontes <sup>3</sup>, Heloisa Onias <sup>3</sup>, Draulio B. de Araujo <sup>3</sup> Philipp Hövel <sup>1,2,4</sup> and G. M. Viswanathan <sup>5,6</sup>

1

2

3

4

5

6

7

8

9

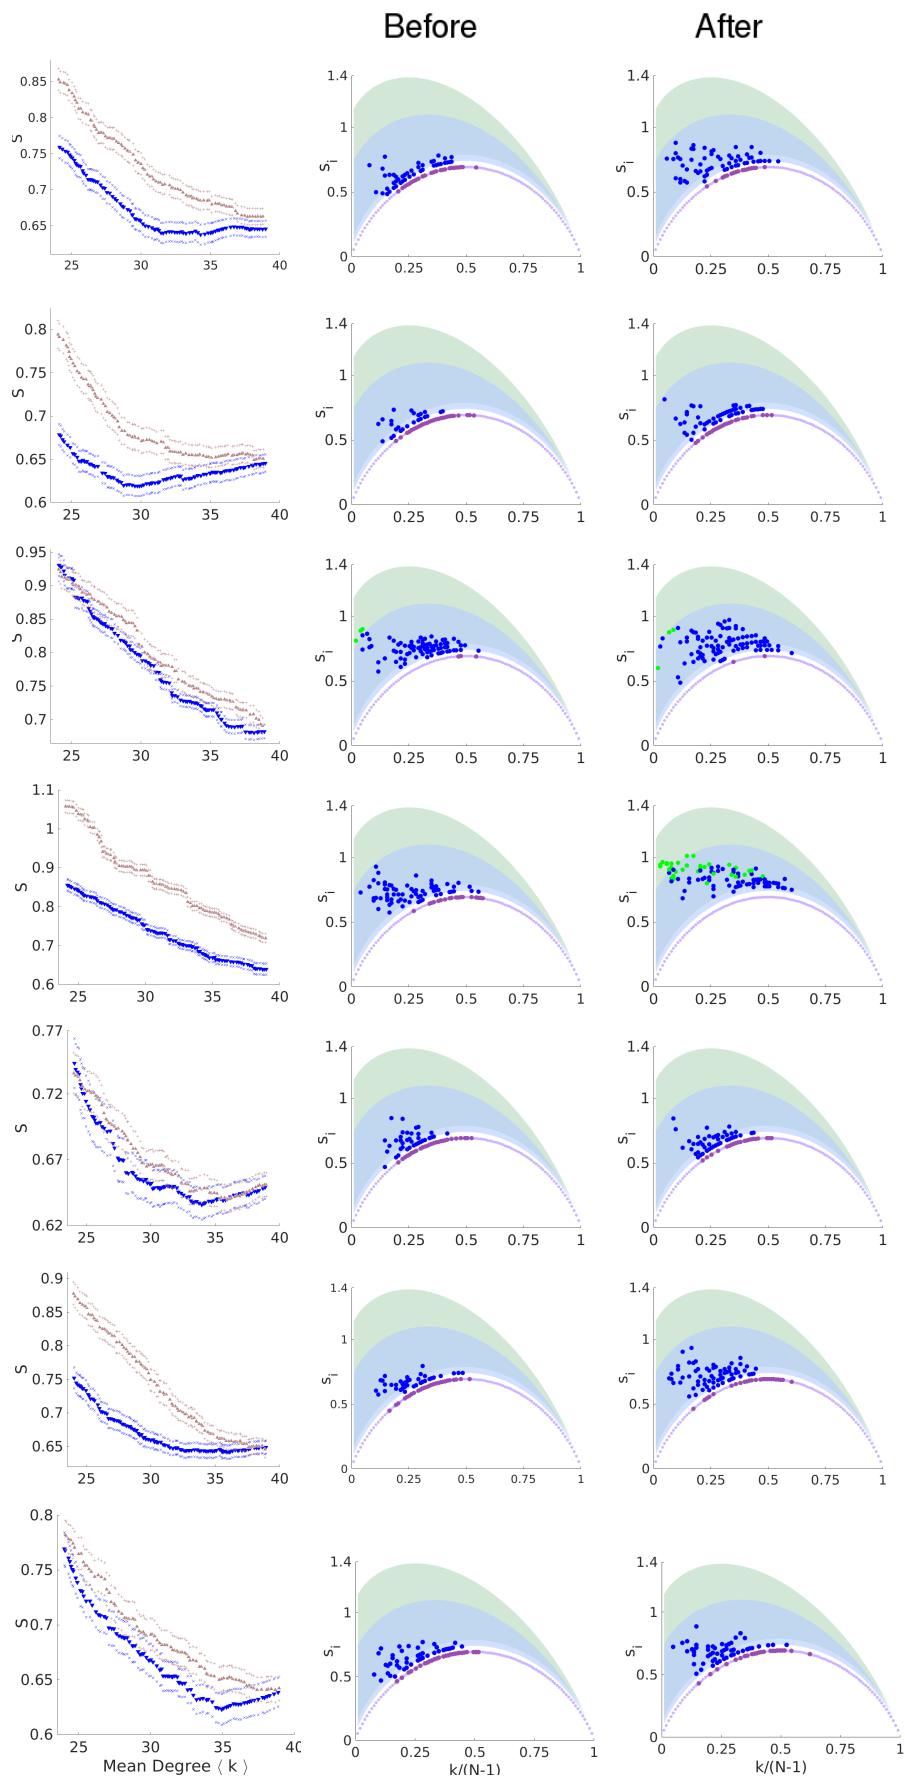

Figure 7. See next page for caption.

**Figure S1.** Geodesic entropy before and after Ayahuasca intake for all 7 subjects. The first column depicts the curves to characteristic geodesic entropy for networks with the mean degree from  $\langle k \rangle = 24$  to  $\langle k \rangle = 39$  for before (blue) and after (brown) Ayahuasca intake. The second and third columns show the entropy-degree diagram for before and after respectively for networks with mean degree  $\langle k \rangle = 32$ . Note an increase of geodesic entropy for all subjects.
